# Supplementary material for: Gradient of Increasing Aurora B Kinase Activity Is Required for Cells to Execute Mitosis
Source: PubMed Central journal article supplement — J Biol Chem. 2010 Oct 18;285(51):40163–70. doi: 10.1074/jbc.M110.181545 (PMC3000998; doi:10.1074/jbc.m110.181545), 2010-10-18
Supplement: supp_M110.181545_jbc.M110.181545-1.pdf [file supp_M110.181545_jbc.M110.181545-1.pdf]

**A gradient of increasing Aurora B activity is required for cells to execute mitosis**

Zhenjie Xu<sup>1</sup>, Paola Vagnarelli, Hiromi Ogawa, Kumiko Samejima\* and William C. Earnshaw\*

Wellcome Trust Centre *for* Cell Biology, University of Edinburgh, Edinburgh, EH9 3JR, UK

<sup>1</sup>present address: Department of Molecular and Cellular Physiology, Stanford University School of Medicine, 279 Campus Drive, Stanford, CA 94305-5345, USA.

\*authors for correspondence: [bill.earnshaw@ed.ac.uk](mailto:bill.earnshaw@ed.ac.uk),  
[kumiko.samejima@ed.ac.uk](mailto:kumiko.samejima@ed.ac.uk)

KEYWORDS: INCENP, Aurora B, DT40

## ***Supplementary Materials***

### ***Supplementary Figure Legends***

**Supplementary Figure 1. Location of TrAP-INCENP Class I structural mutants in conditional INCENP knockout cells. (A)** Experimental design for analysis of the INCENP class I mutant cell lines. INCENP<sup>OFF</sup> cells expressing TrAP-INCENP<sup>WT</sup> or TrAP-INCENP<sup>TSS</sup> mutants were harvested after incubation for 26 or 28 hours in doxycycline. Experiments were repeated independently more than 3 times and no difference was observed between cell populations harvested at the two time points. **(B-F)** Immunofluorescence analysis of INCENP<sup>OFF</sup> cells and INCENP<sup>OFF</sup> cell lines expressing different INCENP<sup>TSS</sup> mutants. **(B)** Endogenous INCENP is efficiently repressed in the presence of doxycycline. **(C)** TrAP-INCENP<sup>WT</sup> localizes normally in INCENP<sup>OFF</sup> cells. **(D)** TrAP-INCENP<sup>W766G</sup> localizes normally at metaphase (panels 1-4), but fails to transfer to the central spindle at anaphase in INCENP<sup>OFF</sup> cells (panels 5-8). **(E,F)** TrAP-INCENP<sup>TS814AS815A</sup> and TrAP-INCENP<sup>TS814ES815E</sup> both localize normally throughout mitosis in INCENP<sup>OFF</sup> cells. SBP staining (panels 2,6, red) reveals the localization of the exogenous INCENP. Total INCENP staining (panels 3,7; green) and DAPI staining for DNA (panels 4,8, blue). **(G,H)** INCENP<sup>OFF</sup> cells expressing the indicated TrAP-INCENP<sup>TSS</sup> mutant were stained with anti-SBP to show the localization of the exogenous INCENP (panels 2,6; red) or with antibodies to Survivin (**G** panels 3,7:Green) or Borealin (**H**, panels 3,7; green). Scale bar - 5  $\mu$ m. **(G,H)** Controls for the measurements of Aurora B activity shown in Figure 2. **(G)** Mitotic index of

each cell line at the time of harvesting. **(H)** Ratio of Aurora B protein levels versus the loading control alpha-tubulin for each sample, as measured on the LiCor Odyssey.

**Supplementary Figure 2. Mitotic indices of INCENP<sup>OFF</sup> cultures expressing exogenous INCENP<sup>WT</sup>, INCENP<sup>TS814AS815A</sup> and INCENP<sup>TS814ES815E</sup> and Quantitative Comparison of Aurora B kinase activity in INCENP<sup>OFF</sup> cells expressing INCENP<sup>F802A</sup> and INCENP<sup>TS814AS815A</sup> mutants. (A,B)** Mitotic indices of INCENP<sup>OFF</sup> cultures expressing exogenous INCENP<sup>WT</sup>, INCENP<sup>TS814AS815A</sup> and INCENP<sup>TS814ES815E</sup>. **(C)** Estimation of Aurora B activity by immunoblotting. Asynchronous cells were harvested following treatment with doxycycline for 28 hours or with 2  $\mu$ M ZM447439 for 5 hours and lysates subjected to immunoblotting with the antibodies indicated.  $\alpha$ -tubulin and Haspin kinase substrate H3T3ph are shown as controls. **(D)** Measurement of H3S10ph levels in the same samples using the LiCor Odessy. **(E)** Ratio of Aurora B protein levels versus the loading control  $\alpha$ -tubulin for each sample, as measured on the Li-Cor Odyssey. **(F)** Mitotic index of each cell line at the time of harvesting.

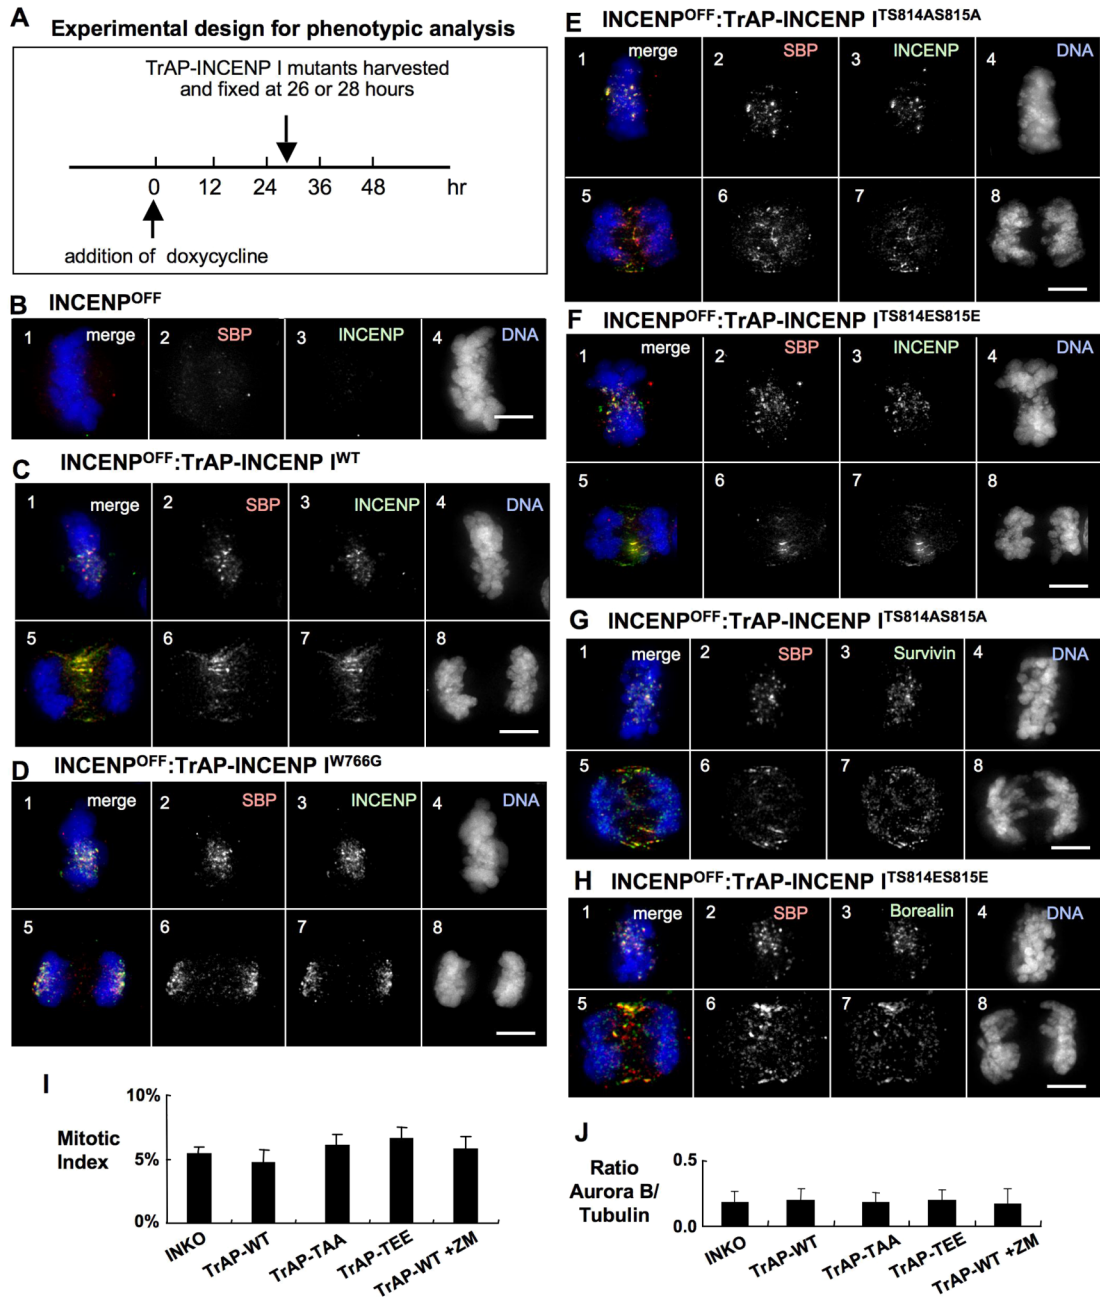

Xu et al. Suppl. Fig. 1

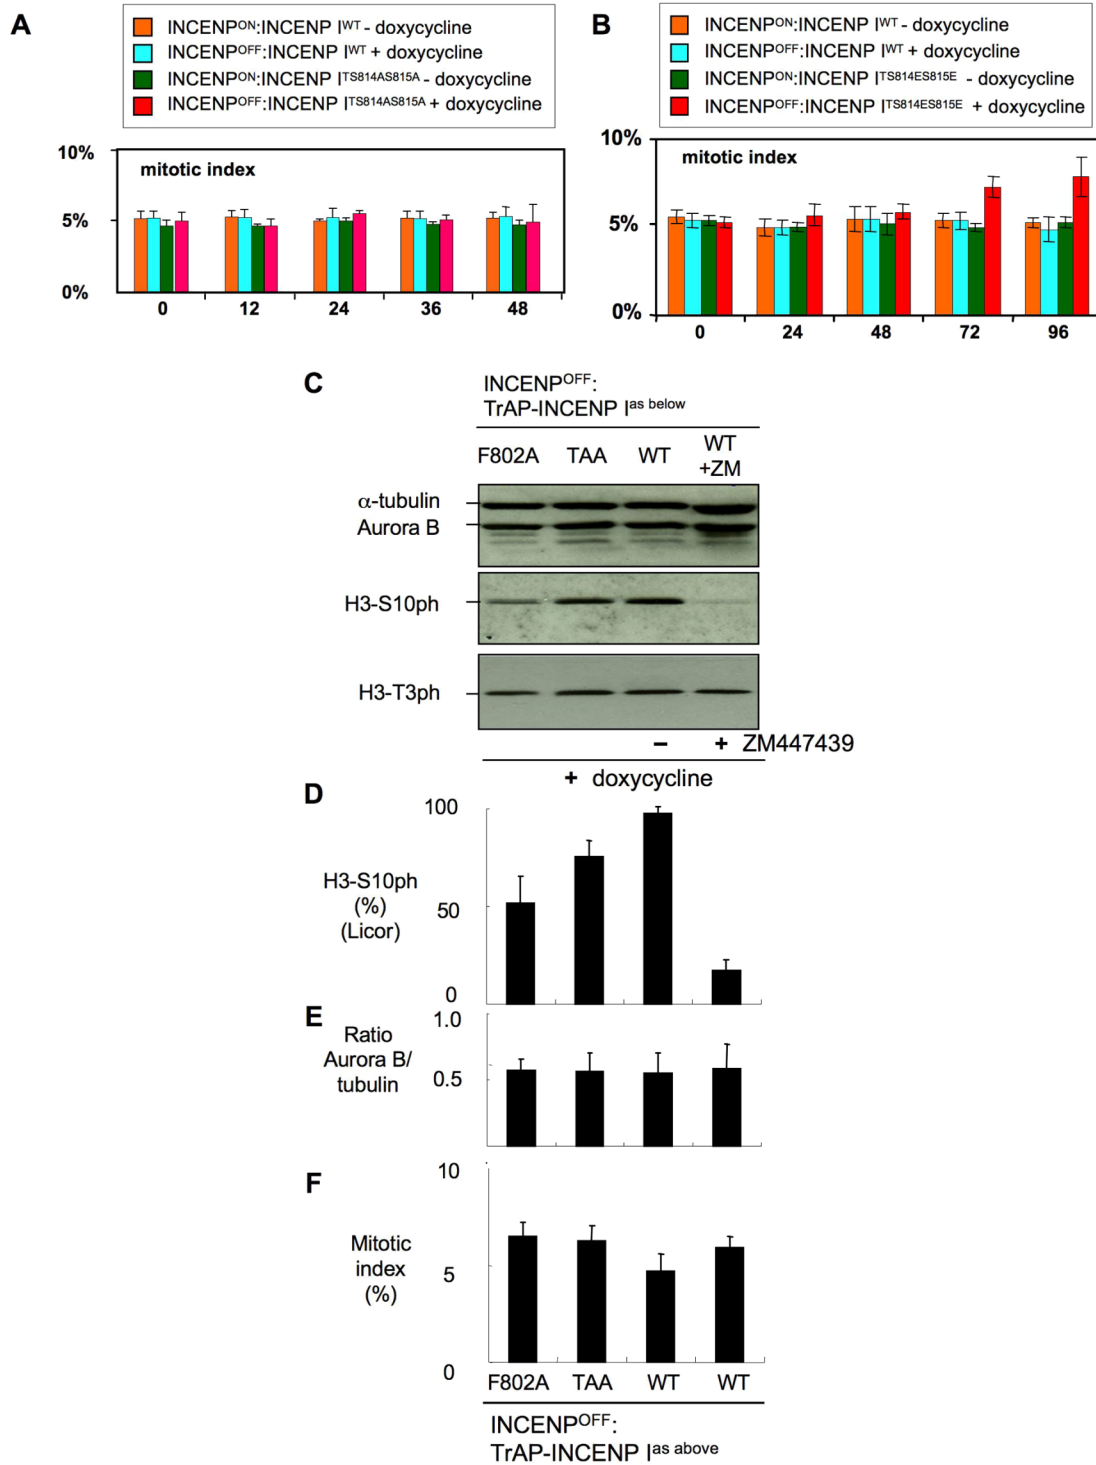

Xu et al. Suppl. Fig. 2
